# Supplementary material for: Sub-stoichiometric WO2.9 for formaldehyde sensing and treatment: a first-principles study
Source: Royal Society of Chemistry journal article supplement (doi:10.1039/c6ta04291k), 2016-01-01
Supplement: c6ta04291k1.pdf [file c6ta04291k1.pdf]

## Sub-stoichiometric WO<sub>2.9</sub> for formaldehyde sensing and treatment: a first principles study

Dandan Wang,<sup>†</sup> Dongxue Han,<sup>\*,†</sup> Lei Liu,<sup>‡</sup> and Li Niu<sup>†</sup>

<sup>†</sup>State Key Laboratory of Electro analytical Chemistry, c/o Engineering Laboratory for Modern Analytical Techniques, Changchun Institute of applied Chemistry, Chinese Academy of Science, Changchun, 130022, Jilin, China.

<sup>‡</sup>State Key Laboratory of Luminescence and Applications, Changchun Institute of Optics, Fine Mechanics and Physics, Chinese Academy of Sciences, No.3888 Dongnanhu Road, Changchun, 130033, Jilin, China.

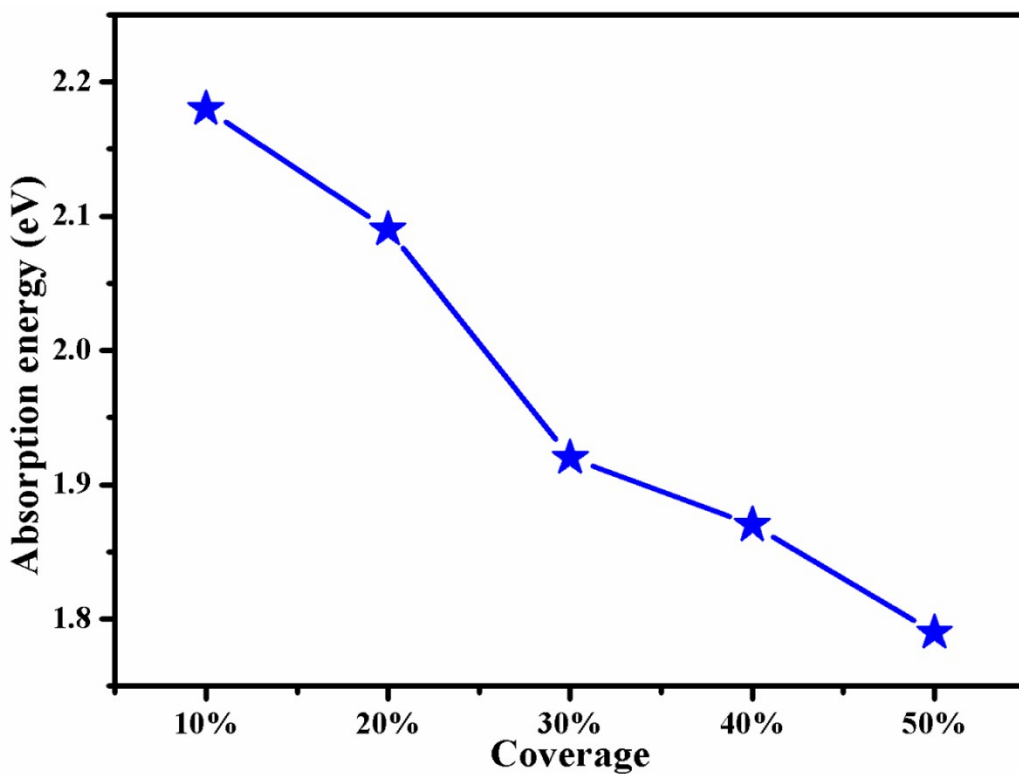

Figure S1. Coverage-dependent absorption energies of HCHO on WO<sub>2.9</sub> (010) surface in configurations of type I.

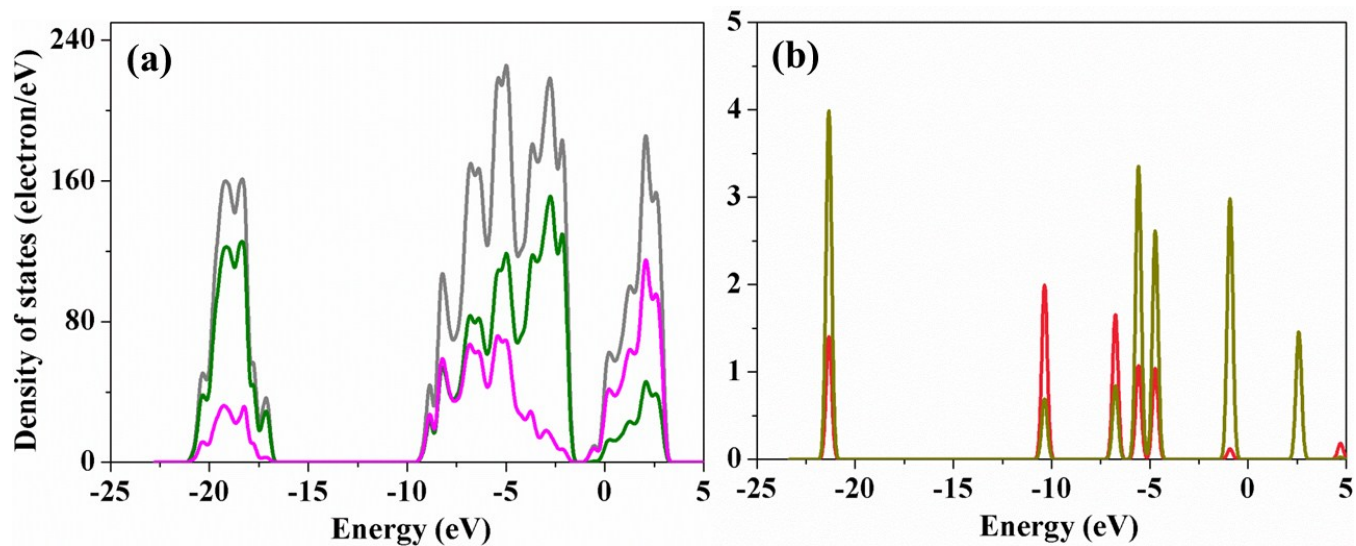

**Figure S2.** (a) The total density of states (TDOS) for  $\text{WO}_{2.9}$  (010) surface (Gray curve) and DOS projected on the O atoms (Olive curve) and on the W atoms (Pink curve); (b) DOS projected (PDOS) on the  $\text{C}_F$  atom of HCHO molecule (Magenta curve) and on the  $\text{O}_F$  atom of HCHO molecule (Dark yellow curve). The Fermi level of  $\text{WO}_{2.9}$  (010) surface is assigned at 0 eV.

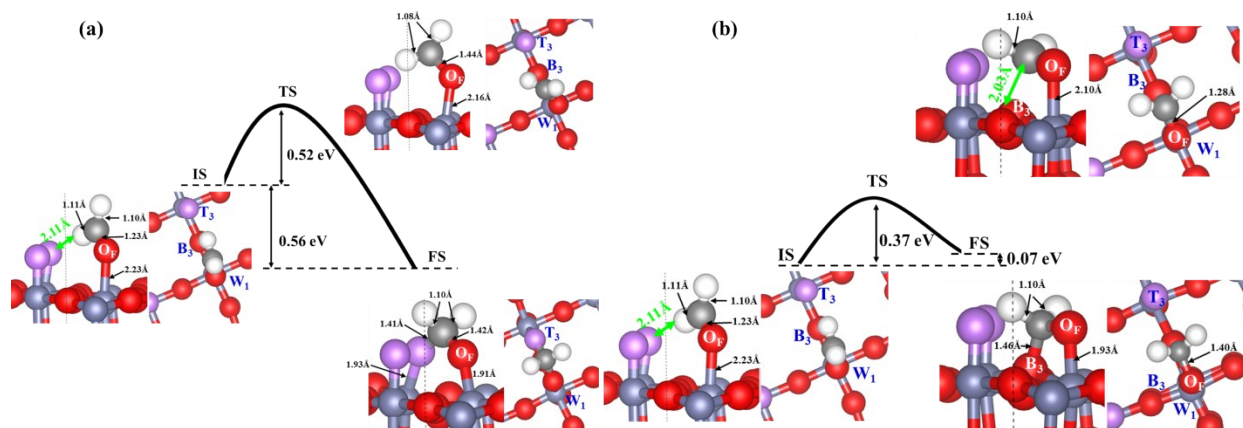

**Figure S3.** The barriers and the corresponding transition states of (a) the Type I and (b) the type III adsorption configurations transformed from type IV.

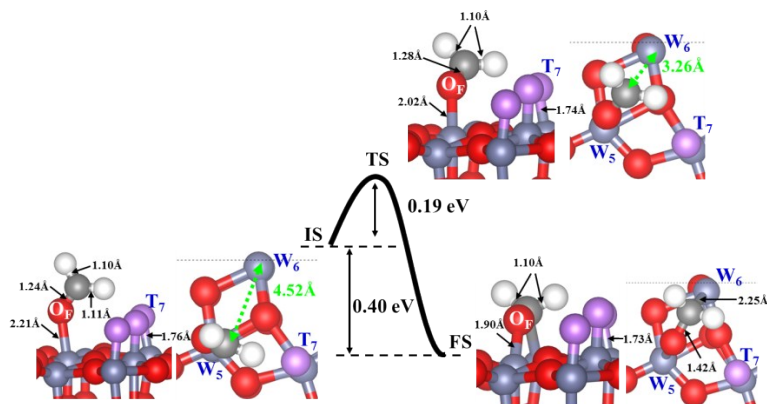

**Figure S4.** The minimum energy path for HCHO absorption configuration transform from type IV to type II.
